# Supplementary material for: CD4+ and CD8+ T cells have opposing roles in breast cancer progression and outcome
Source: PubMed Central journal article supplement (PMC4627321; doi:10.18632/oncotarget.3958), 2015-04-29
Supplement: oncotarget-06-17462-s001.pdf [file oncotarget-06-17462-s001.pdf]

# CD4<sup>+</sup> and CD8<sup>+</sup> T cells have opposing roles in breast cancer progression and outcome

## Supplementary Material

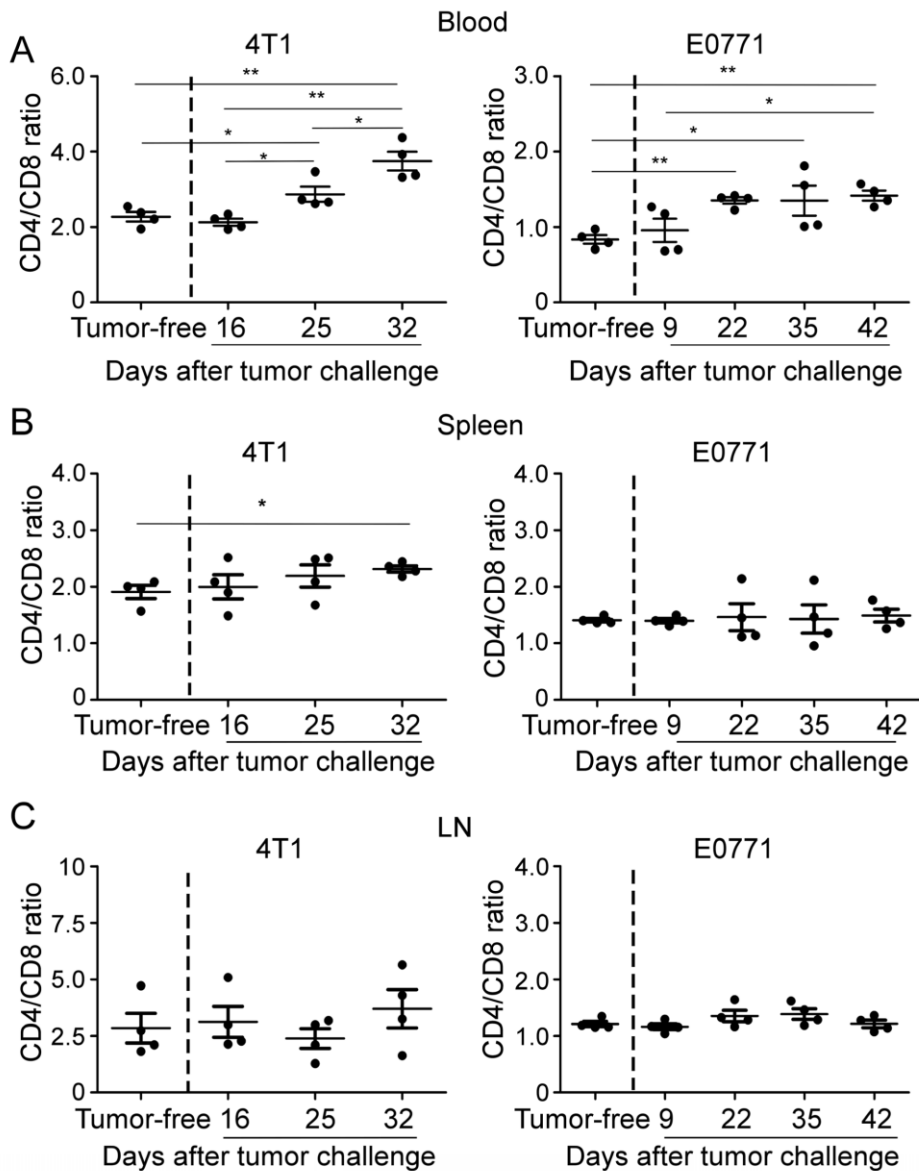

## Supplemental Figure 1

(A) to (C) Dynamic changes of CD4<sup>+</sup> to CD8<sup>+</sup> T cell ratios in peripheral blood (A), spleen (B) and draining lymph nodes (C) at the different stages of tumor development in two models. Tumor-free BALB/c (4T1) and C57BL/6 (E0771) mice were included as controls. The treatment procedure was identical as that described in Figure 1. T cells were isolated from the organs and proportions of CD4<sup>+</sup> and

CD8<sup>+</sup> T cells detected at the indicated time points using flow cytometry analyses by gating CD3<sup>+</sup> population. Results shown in (A) to (C) are mean  $\pm$  SE from four individual mice in each time point. \*  $p < 0.05$  and \*\*  $p < 0.01$  between the indicated two groups determined by paired student's T-test.

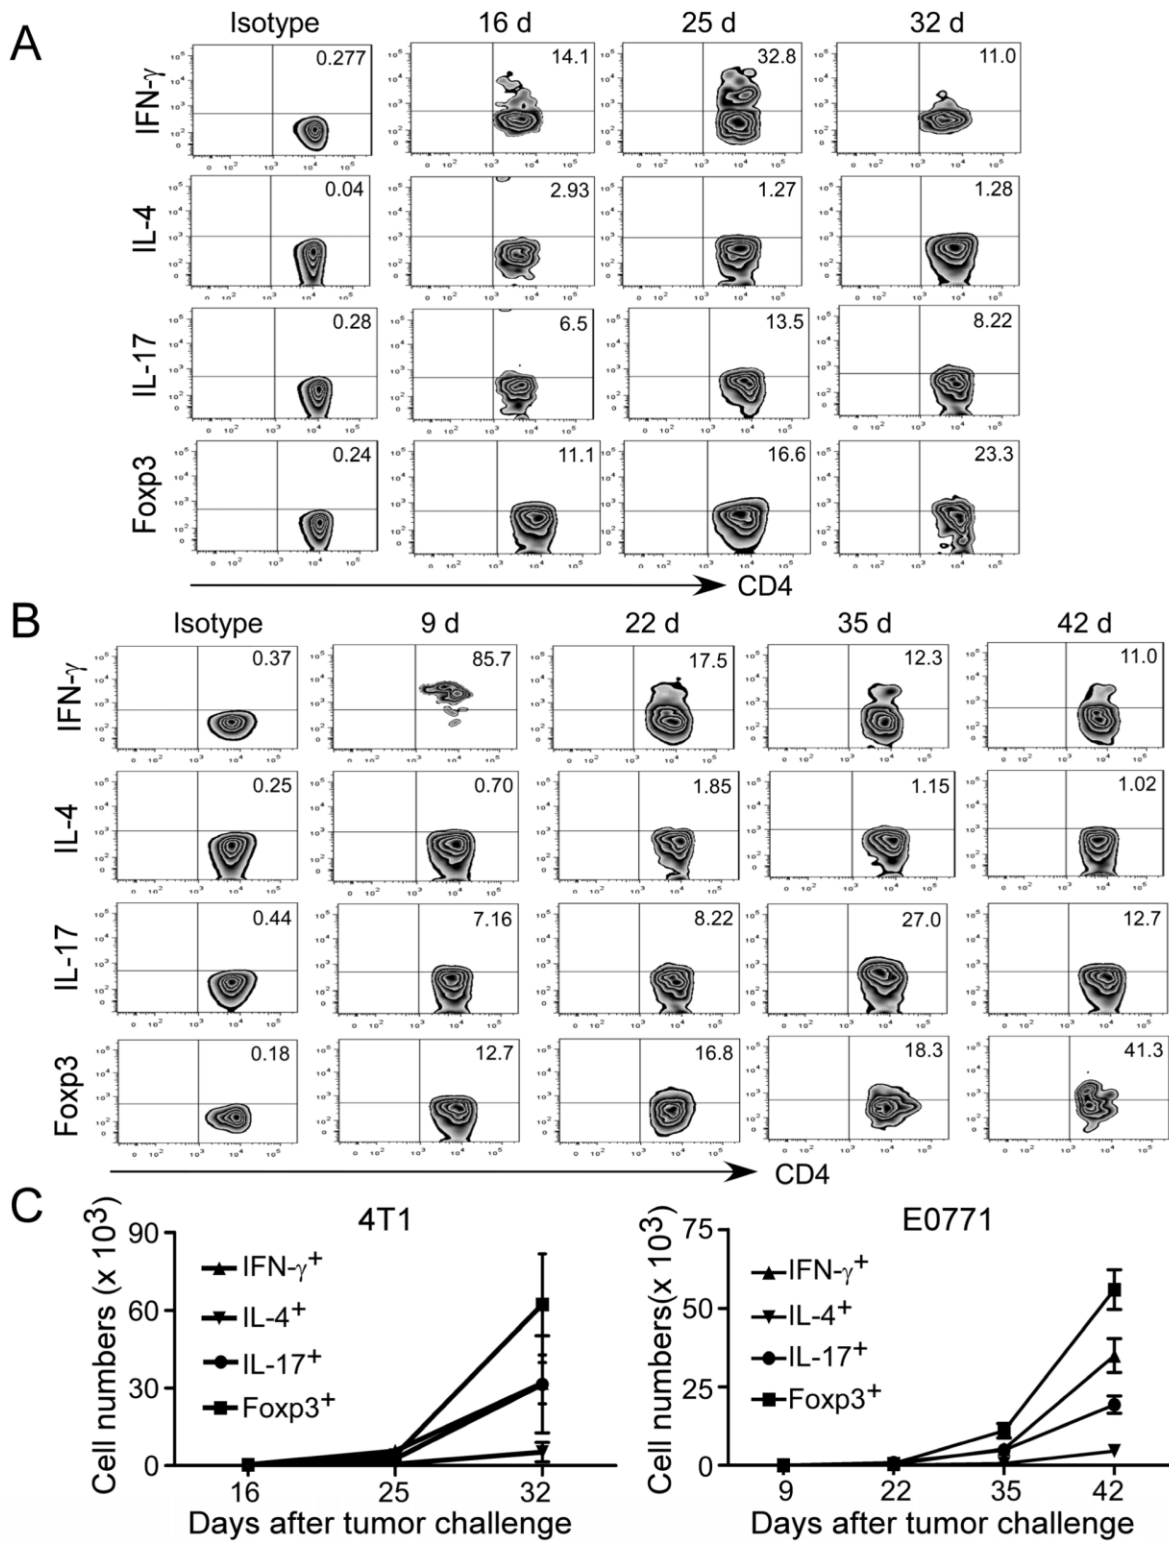

**Supplemental Figure 2**

**Dynamic analyses of tumor-infiltrating CD4 $^+$  T cell subsets in mouse breast cancer models.**

(A) and (B) Proportions of CD4 $^+$  T cell subsets in TILs were analyzed at the indicated time points using flow cytometry analyses by gating CD4 $^+$  population. Representative FACS graphs from 4T1-bearing mice (A) and E0771-bearing mice (B) are shown. The treatment procedure was identical as that described in

Figure 1. TILs were isolated and intracellular staining performed after stimulation with PMA and ionomycin for 5 hours. **(C)** Total cell numbers of CD4<sup>+</sup> T cell subsets were concluded. Data shown are mean  $\pm$  SE from four individual mice in each group.

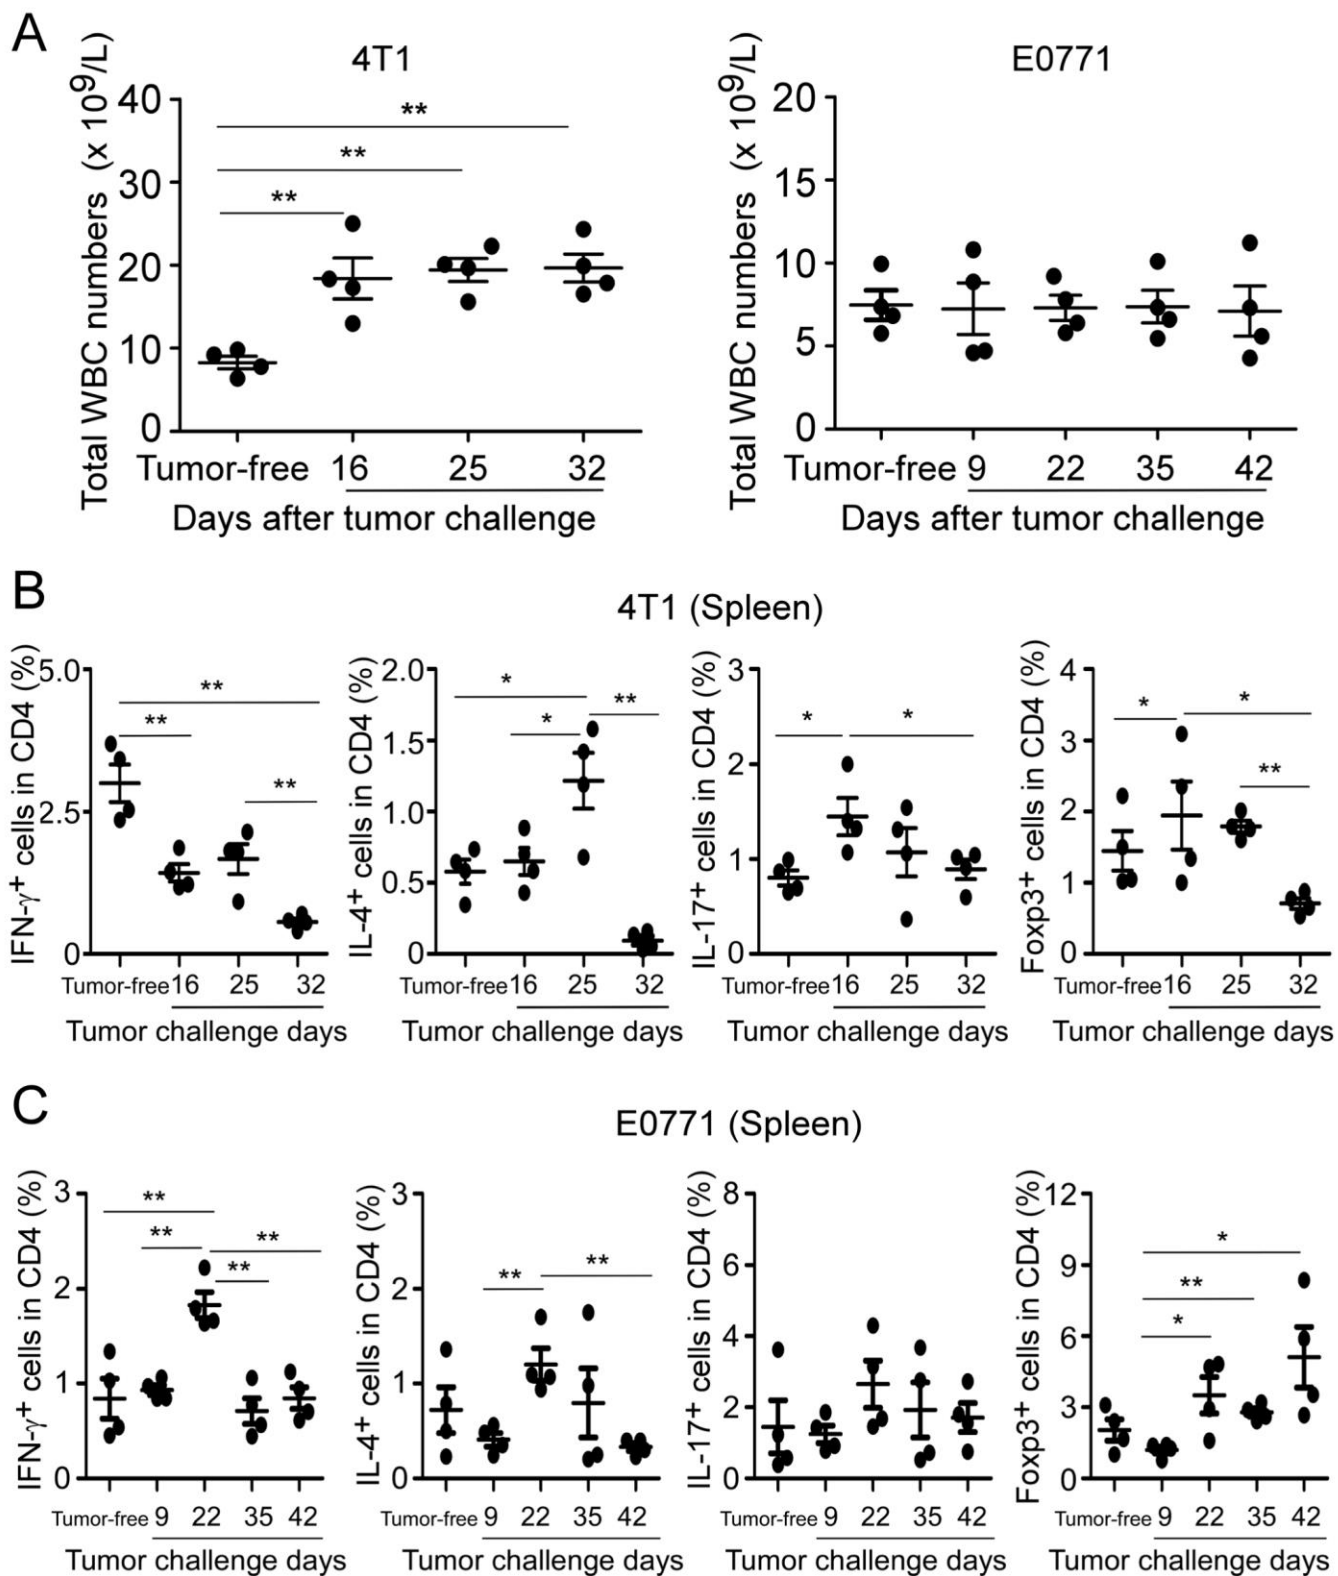

**Supplemental Figure 3**

**Distributions of CD4 $^+$  T cell subsets in blood and spleens in breast tumor-bearing mice.**

**(A)** Peripheral blood from two mouse breast tumor models were collected and total white blood cell numbers counted. The mouse treatment procedure was identical as that described in Figure 1. **(B)** and **(C)** The dynamic distributions of CD4<sup>+</sup> T cell subsets in spleens from breast tumor-bearing mice in two models were analyzed at the indicated time points using flow cytometry analyses by gating CD4<sup>+</sup> population. The treatment procedure was identical as that described in Figure 1. T cells were isolated from the organs and intracellular staining performed after stimulation with PMA and ionomycin for 6 hours. Results shown in (A) to (C) are mean  $\pm$  SE from four individual mice in each time point. Tumor-free BALB/c (4T1) and C57BL/6 (E0771) mice were included as controls. \*  $p < 0.05$  and \*\*  $p < 0.01$  between the indicated two groups determined by paired student's T test.

Supplemental Table 1.

**A. Univariate analyses of factors associated with Relapse-free Survival and Overall Survival in breast cancer patients (n=81).**

| Variables                     | Relapse-free Survival |               |                 | Overall survival |               |                 |
|-------------------------------|-----------------------|---------------|-----------------|------------------|---------------|-----------------|
|                               | HR                    | 95% CI        | p               | HR               | 95% CI        | p               |
| <b>CD4 (&gt;16)</b>           | 3.92                  | 1.48 to 10.36 | <b>0.005</b>    | 2.61             | 1.17 to 5.82  | <b>0.02</b>     |
| <b>CD8 (&gt;13)</b>           | 0.06                  | 0.01 to 0.47  | <b>6.71E-05</b> | 0.32             | 0.13 to 0.79  | <b>0.007</b>    |
| <b>CD4/CD8 (&gt;1.2)</b>      | 10.87                 | 2.46 to 47.23 | <b>5.01E-05</b> | 3.73             | 1.48 to 9.41  | <b>0.002</b>    |
| <b>Stage ( III vs I + II)</b> | 11.94                 | 4.31 to 33.07 | <b>1.53E-06</b> | 6.72             | 2.88 to 15.71 | <b>1.65E-05</b> |
| <b>Nodal (Positive)</b>       | 16.71                 | 3.76 to 74.26 | <b>1.35E-06</b> | 6.97             | 2.58 to 18.79 | <b>1.15E-05</b> |

Note: Results obtained using the Cox proportional hazard regression model. Boldface indicates the significance of the *p* value.

**B. Multivariate analyses of Hazard Ratios with Relapse-free Survival and Overall Survival in breast cancer patients (n=81).**

| Variables                     | Relapse-free Survival |               |             | Overall survival |               |             |
|-------------------------------|-----------------------|---------------|-------------|------------------|---------------|-------------|
|                               | HR                    | 95% CI        | p           | HR               | 95% CI        | p           |
| <b>CD4 (&gt;16)</b>           | 1.37                  | 0.35 to 5.25  | 0.65        | 1.37             | 0.49 to 3.81  | 0.55        |
| <b>CD8 (&gt;13)</b>           | 0.05                  | 0.01 to 0.51  | <b>0.01</b> | 0.28             | 0.09 to 0.93  | <b>0.04</b> |
| <b>CD4/CD8 (&gt;1.2)</b>      | 0.65                  | 0.08 to 5.48  | 0.68        | 0.69             | 0.17 to 2.78  | 0.60        |
| <b>Stage ( III vs I + II)</b> | 4.54                  | 1.04 to 22.02 | <b>0.04</b> | 2.76             | 0.99 to 7.71  | <b>0.05</b> |
| <b>Nodal (Positive)</b>       | 9.46                  | 1.19 to 74.74 | <b>0.03</b> | 4.61             | 1.29 to 16.44 | <b>0.02</b> |

Note: Results obtained using the Cox proportional hazard regression model. Boldface indicates the significance of the *p* value.
